# Supplementary material for: First detection of Colletotrichumfructicola (Ascomycota) on horsehair worms (Nematomorpha)
Source: Biodivers Data J. 2021 Sep 23;9:e72798. doi: 10.3897/BDJ.9.e72798 (PMC8484196; doi:10.3897/BDJ.9.e72798)
Supplement: Supplementary material 3 — Accession list of the sequences used in this study [file bdj-09-e72798-s003.csv]

Name	ITS	GAPDH	ACT	CHS-1	CAL
(C. acutatum species complex)
C. acutatum	JQ005776	JQ948677	JQ005839	JQ005797	-
C. miaoliense	MK908419	MK908470	MK908573	MK908523	-
(C. boninense species complex)
C. boninense	MK908424	MK908475	MK908578	MK908527	MK908677
C. karsti	MK908422	MK908473	MK908576	MK908525	MK908675
(C. gloeosporioides species complex)
C. gloeosporioides	JX010152	JX010056	JX009531	JX009818	JX009731
C. fructicola	MK908461	MK908513	MK908615	MK908564	MK908714
C. siamense	MK908426	MK908477	MK908580	MK908529	MK908679
C. musae	JX010146	JX010050	JX009433	JX009896	JX009742
C. theobromicola	JX010294	JX010006	JX009444	JX009869	JX009591
C. tropicale	JX010264	JX010007	JX009489	JX009870	JX009719
C. asianum	FJ972612	JX010053	JX009584	JX009867	FJ917506
C. tainanense	MH728818	MH728823	MH781475	MH805845	-
C. aeschynomenes	JX010176	JX009930	JX009483	JX009799	JX009721
